# Supplementary material
Source: PubMed Central journal article supplement (PMC6368977)
Supplement: NIHMS942847-supplement-supplemental.pdf [file NIHMS942847-supplement-supplemental.pdf]

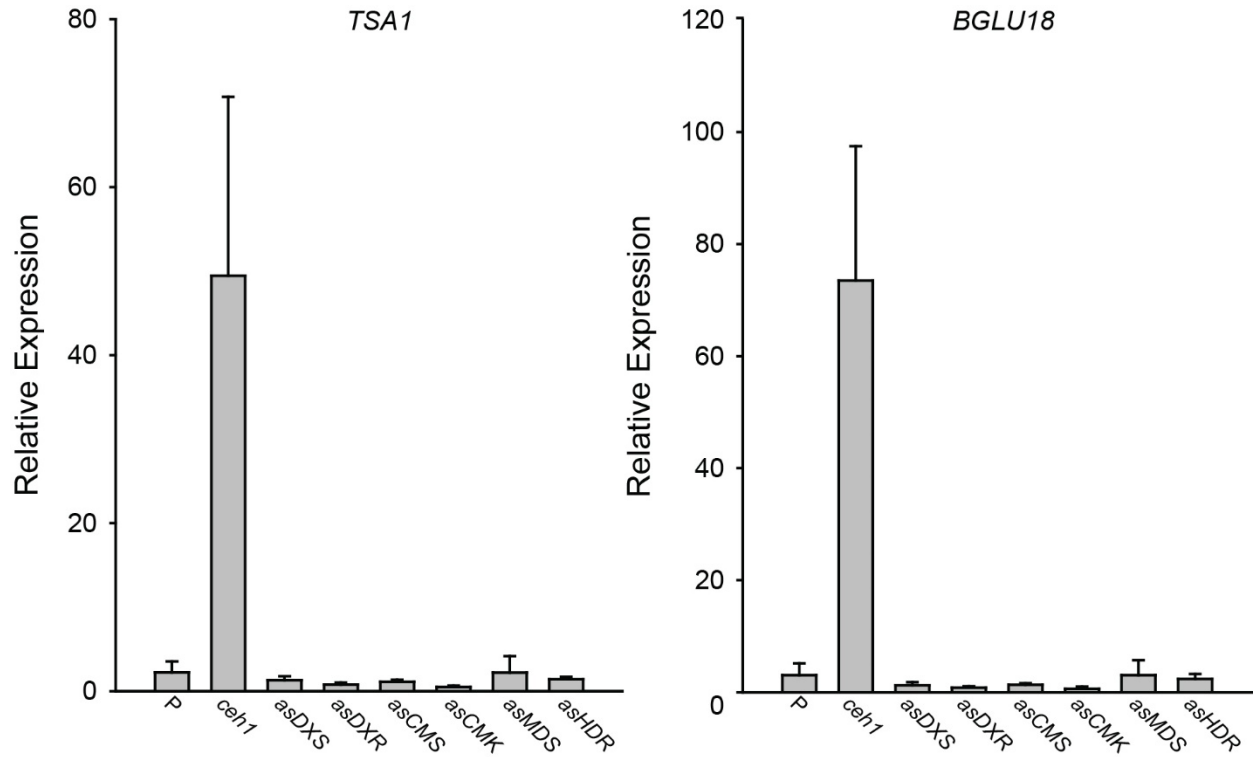

**Supplemental Figure 1. Induction of wound inducible ER body genes *TSA1* and *BGLU18* is exclusive to the *ceh1* mutant.**

Relative expression levels of wound inducible ER marker genes (*TSA1* and *BGLU18*) in *ceh1* and MEP pathway RNAi lines. Total RNA extracted from these genotypes was subjected to real-time quantitative-PCR analysis. The transcript levels were normalized to *At4g26410* (M3E9) measured in the same samples. Data are mean fold difference  $\pm$ SD of three biological replicates each with three technical repeats.

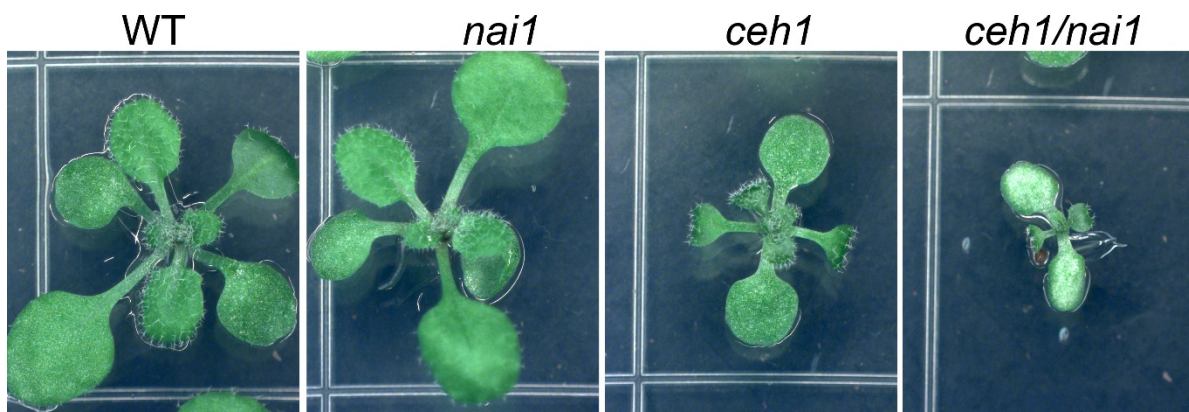

**Supplemental Figure 2. Phenotypes of various genotypes (WT, *nai1*, *ceh1* and *ceh1/nai1*).**

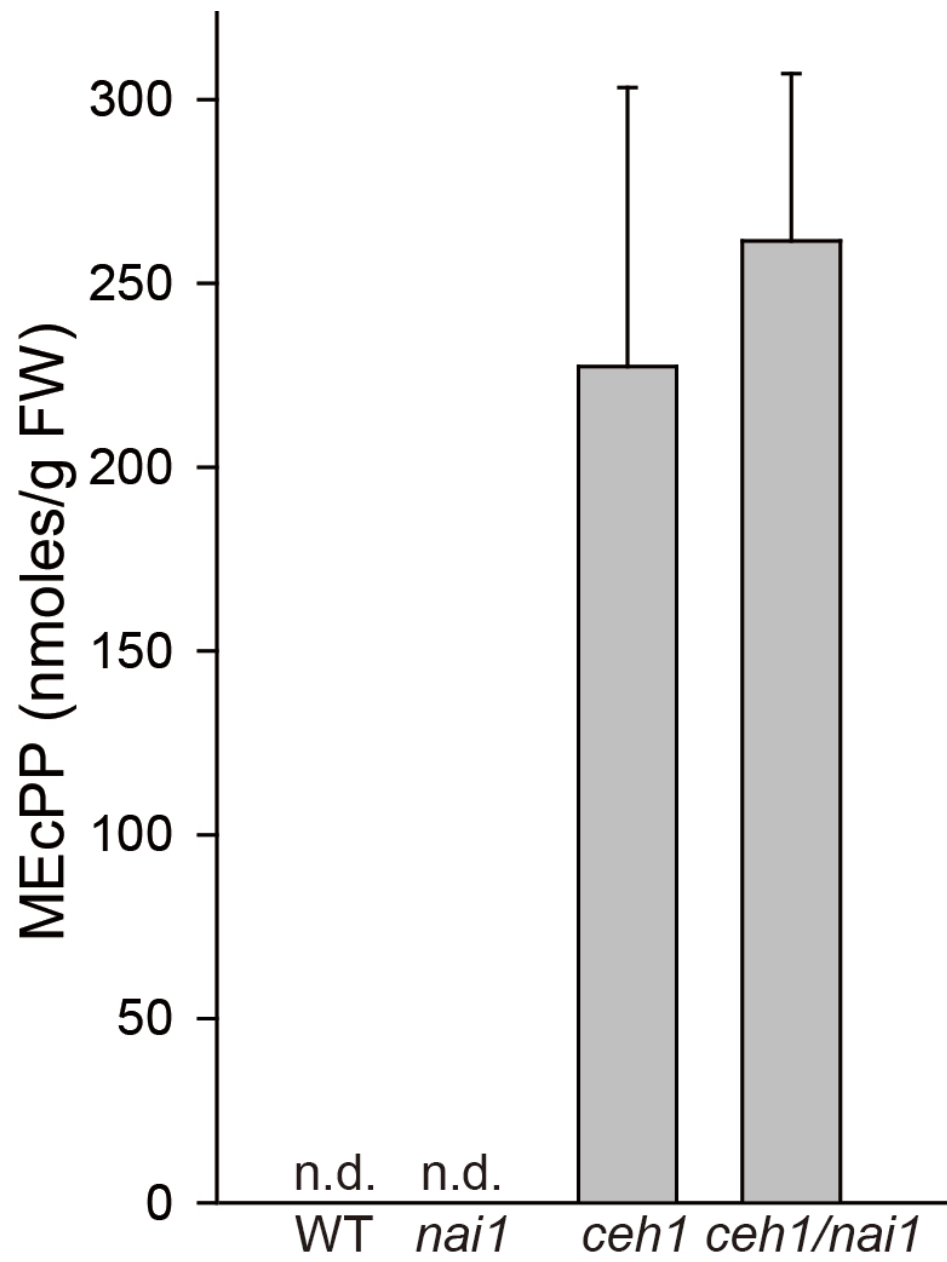

Supplemental Figure 3. MEcPP levels in various genotypes (WT, *nai1*, *ceh1* and *ceh1/nai1*).

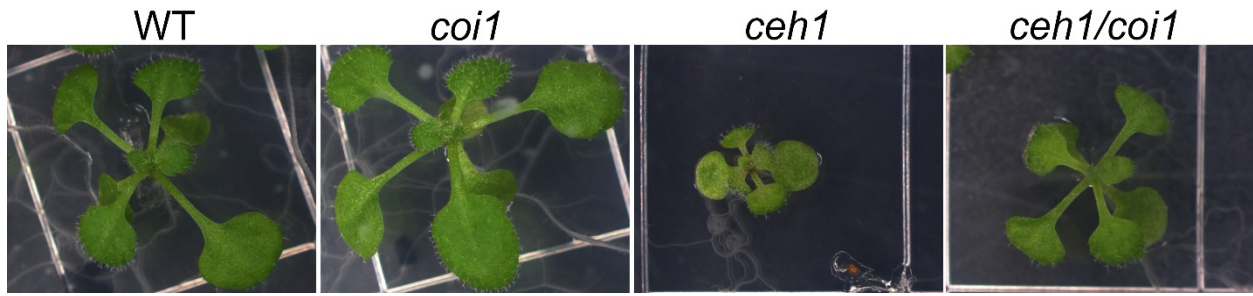

**Supplemental Figure 4. Phenotypes of various genotypes (WT, *coi1*, *ceh1* and *ceh1/coi1*).**

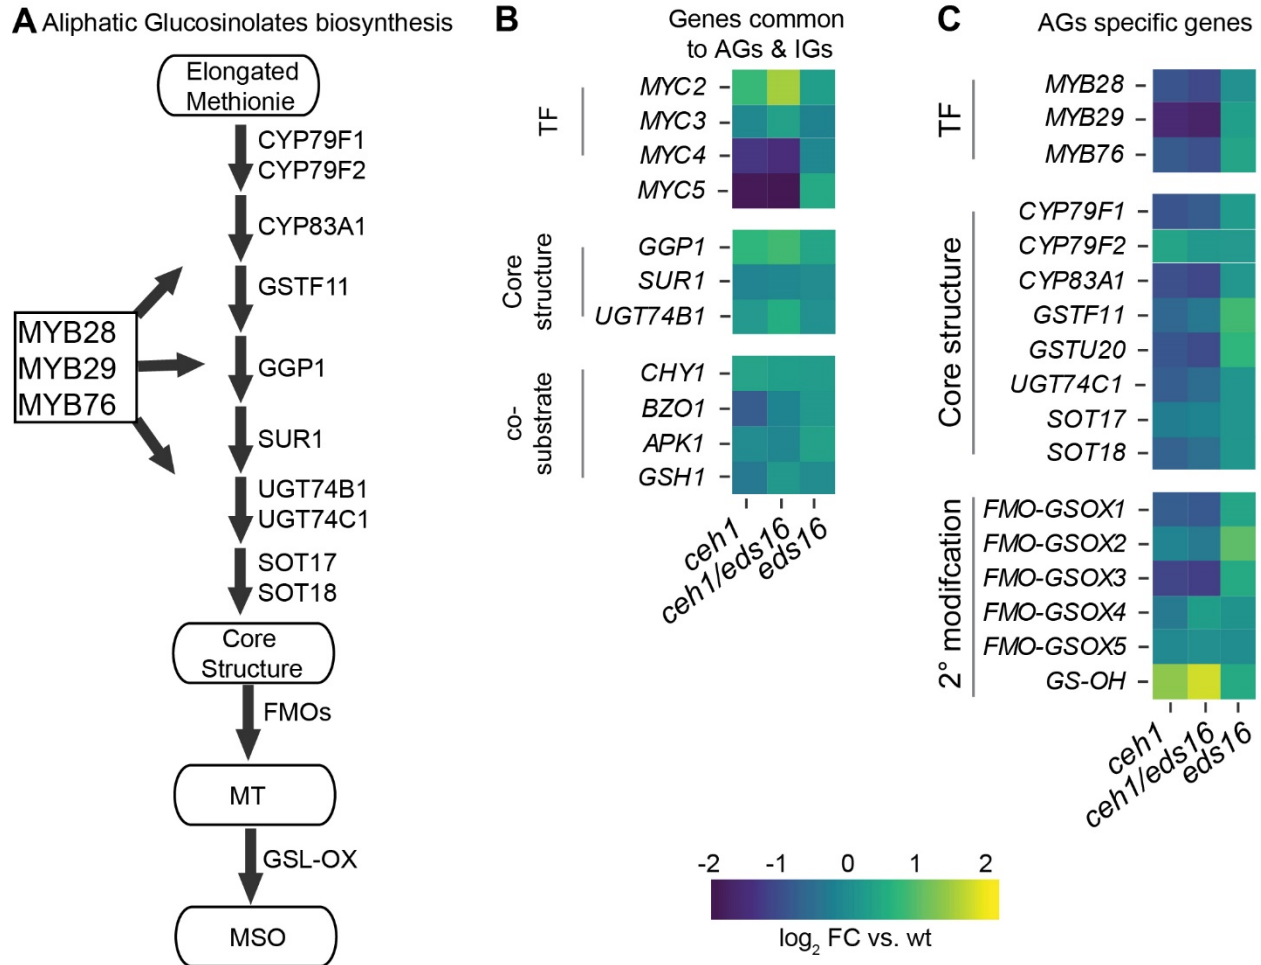

**Supplemental Figure 5. MEcPP does not induce expression of genes associated with aliphatic glucosinolates (AGs) biosynthesis.** (A) Schematic illustration of AGs biosynthesis pathway and their associated transcription factors (boxed) and metabolites (lassoed). (B) Heatmap of the expression levels of genes common to both the AGs and IGs biosynthesis, in *ceh1*, *ceh1/eds16*, *eds16* as compared to the WT levels using RNAseq data. (C) Heatmap of the expression of genes specifically associated with AGs biosynthesis in *ceh1*, *ceh1/eds16*, *eds16* relative to the WT levels using RNAseq data. The  $\log_2$ -fold change for *ceh1* (left), *ceh1/eds16* (middle), and *eds16* (right) vs WT is represented by color, from -2 (blue) to 2 (yellow).

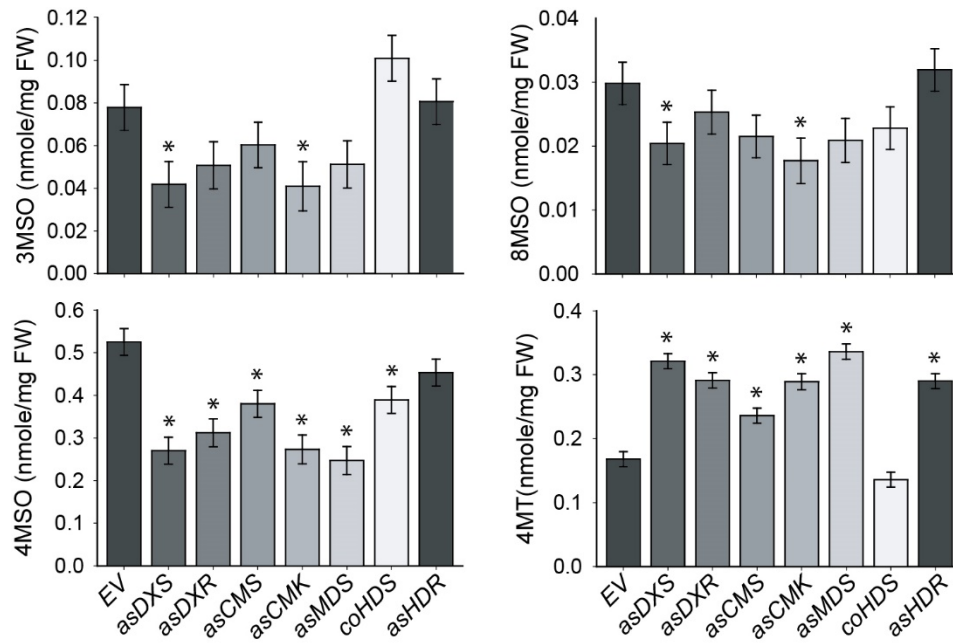

**Supplemental Figure 6. Alteration of aliphatic glucosinolates is not specific to MEcPP.** Measurement of AGs levels in WT transformed with empty vector (EV), RNAi lines silencing MEP-pathway genes individually and co-suppressed (*csHDS*). Data are mean±SEM; n=3. Asterisks show the significant differences relative to EV ( $P < 0.05$ ). All the statistical analyses were performed using ANOVA.

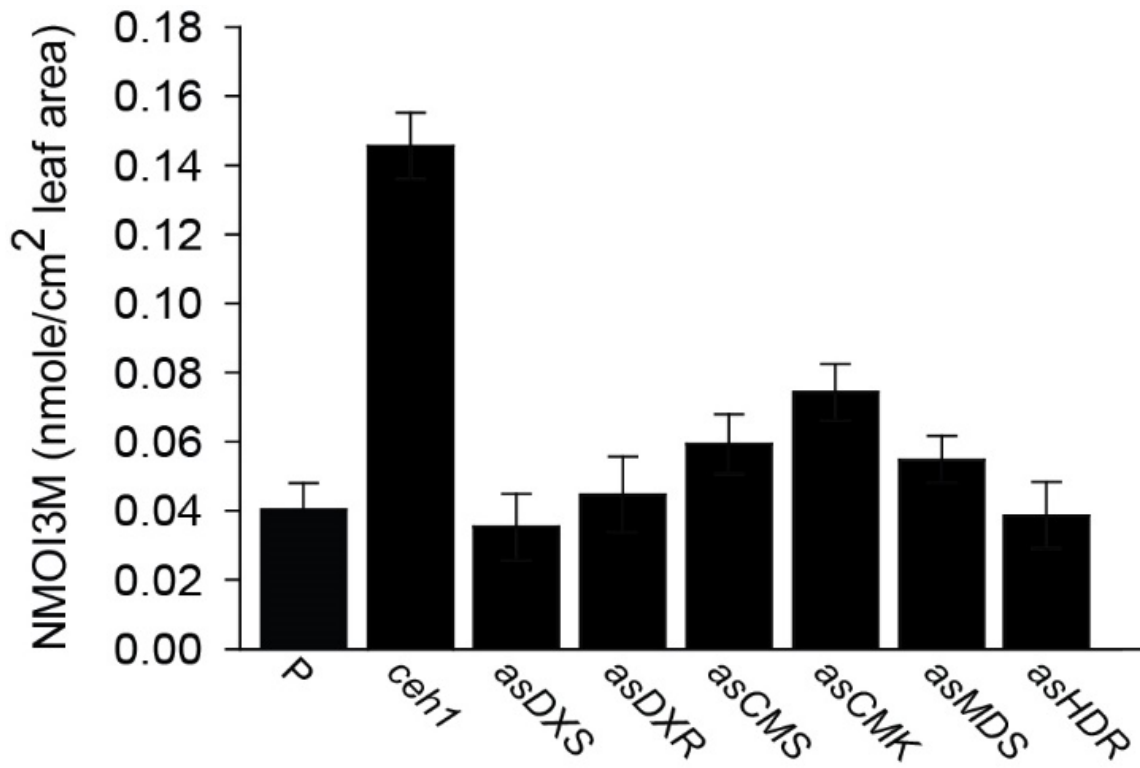

**Supplemental Figure 7. Production of NMOI3M in response to botrytis infection is most prominent in the *ceh1* mutant.**

**Supplemental Table 1. List of annotated ER body localized or associated proteins.**

| Gene ID   | Name         | Reference                                |
|-----------|--------------|------------------------------------------|
| AT3G09260 | PYK10/BGLU23 | (Nagano et al., 2008)                    |
| AT1G66270 | BGLU21       | (Nagano et al., 2008)                    |
| AT1G66280 | BGLU22       | (Nagano et al., 2008)                    |
| AT3G16420 | PBP1/JAL30   | (Nagano et al., 2008)                    |
| AT3G16430 | JAL31        | (Nagano et al., 2008)                    |
| AT3G16450 | JAL33        | (Nagano et al., 2008)                    |
| AT3G16460 | JAL34        | (Nagano et al., 2008)                    |
| AT3G16470 | JAL35        | (Nagano et al., 2008)                    |
| AT1G54000 | GLL22        | (Nagano et al., 2008)                    |
| AT2G22770 | NAI1         | (Matsushima et al., 2004)                |
| AT4G27860 | MEB1         | (Yamada et al., 2013)                    |
| AT5G24290 | MEB2         | (Yamada et al., 2013)                    |
| AT1G52400 | BGLU18       | (Nakano et al., 2014)                    |
| AT5G23820 | ML3          | (Hakenjos et al., 2013)                  |
| AT1G54010 | GLL23        | (Nakano et al., 2016)                    |
| AT1G54030 | MVP 1        | (Agee et al., 2010; Nakano et al., 2012) |
| AT3G15950 | NAI2         | (Yamada et al., 2008)                    |



**Supplemental table 2. List of annotated ER body localized or associated proteins altered in *ceh1*.**

| Gene ID   | Name         | Fold change<br>(log <sub>2</sub> )<br>Expression | <i>P</i> value | Fold change<br>(log <sub>2</sub> )<br>Protein | <i>P</i> value |
|-----------|--------------|--------------------------------------------------|----------------|-----------------------------------------------|----------------|
| AT1G52400 | BGLU18       | 2.396541298                                      | 0.00299129     | 1.135421511                                   | 0.023237       |
| AT3G09260 | PYK10/BGLU23 | 1.175750063                                      | 0.00584943     | 2.419837605                                   | 0.000773       |
| AT3G16420 | PBP1/JAL30   | n.d.                                             | n.d.           | 1.222032104                                   | 0.003441       |
| AT3G16450 | JAL33        | 1.406667546                                      | 0.00579349     | 1.354872393                                   | 0.003285       |
| AT3G16460 | JAL34        | 0.732285878                                      | 0.2226334      | 1.929333173                                   | 0.031609       |
| AT3G16470 | JAL35        | 2.158159579                                      | 0.04639408     | 0.621660709                                   | 0.026101       |
| AT1G54010 | GLL23        | n.d.                                             | n.d.           | 2.344242453                                   | 0.026378       |
| AT3G15950 | NAI2         | 1.020693235                                      | 0.17069045     | 1.786527024                                   | 0.006863       |
| AT4G27860 | MEB1         | 3.250747779                                      | 0.03079126     | 1.781855467                                   | 0.025035       |
| AT5G23820 | ML3          | 1.368483384                                      | 0.01896147     | 0.281228153                                   | 0.144649       |

**Supplemental Table 3. Transcriptomics analysis of GSLs synthesis genes in *ceh1* and *ceh1/eds16*.**

| Glucosinolate | Function               | Gene      |           | ceh vs. wt |         | ceh/eds vs. wt |         | eds vs. wt |         |
|---------------|------------------------|-----------|-----------|------------|---------|----------------|---------|------------|---------|
|               |                        | TAIR ID   | NAME      | log2 FC    | q       | log2 FC        | q       | log2 FC    | q       |
| Indolic       | Core structure         | AT2G22330 | CYP79B3   | -0.2393    | 0.181   | -0.0575        | 0.801   | 0.1242     | 0.708   |
| Indolic       | Core structure         | AT2G30860 | GSTF9     | 1.00816    | 2E-08 * | 1.34414        | 14      | 0.3424     | 0.242   |
| Indolic       | Core structure         | AT2G30870 | GSTF10    | 1.51315    | 6E-16 * | 2.26044        | 9E-35 * | -0.008     | 0.99    |
| Indolic       | Core structure         | AT1G24100 | UGT74B1   | 0.11227    | 0.653   | 0.47359        | 0.027   | -0.027     | 0.961   |
| Indolic       | Core structure         | AT1G74100 | SOT16     | 0.59503    | 8E-06   | 1.10667        | 18      | -0.073     | 0.815   |
| Indolic       | unknown                | AT1G76790 | AT1G76790 | 2.64603    | 3E-30 * | 3.88737        | 65      | 1.4472     | 0.07 *  |
| Indolic       | Core structure         | AT4G31500 | CYP83B1   | 0.77821    | 3E-12   | 1.05165        | 21      | -0.287     | 0.093   |
| Indolic       | unknown                | AT4G37400 | CYP81F3   | -0.2013    | 0.661   | -0.8608        | 0.045   | 0.1005     | 0.915   |
| Indolic       | unknown                | AT4G37410 | CYP81F4   | 1.37819    | 0.014 * | 1.85363        | 8E-04 * | 0.2978     | NA      |
| Indolic       | unknown                | AT4G37430 | CYP81F1   | 0.80999    | 0.013   | 0.55712        | 0.127   | 0.0976     | 0.905   |
| Indolic       | Core structure         | AT4G39950 | CYP79B2   | 1.71285    | 7E-22 * | 2.1347         | 1E-33 * | -0.02      | 0.972   |
| Indolic       | Core structure         | AT5G05730 | ASA1      | 1.00615    | 1E-16 * | 1.43772        | 2E-33 * | -0.212     | 0.343   |
| Indolic       | Secondary Modification | AT1G21100 | IGMT1     | 0.99226    | 7E-07   | 2.0832         | 28      | -0.248     | 0.538   |
| Indolic       | Secondary Modification | AT1G21120 | IGMT2     | 1.21815    | 9E-06 * | 2.0722         | 3E-15 * | -1.049     | 0.016 * |
| Indolic       | Secondary Modification | AT1G21110 | IGMT3     | 1.20028    | 2E-06 * | 1.9029         | 6E-15 * | -0.28      | 0.584   |
| Indolic       | Secondary Modification | AT1G21130 | IGMT4     | 0.8836     | 1E-07   | 1.62861        | 4E-24 * | -0.327     | 0.229   |
| Indolic       | Core structure         | AT5G54810 | TSB1      | 0.48686    | 6E-04   | 1.20665        | 6E-20 * | -0.053     | 0.877   |
| Indolic       | Core structure         | AT5G57220 | CYP81F2   | 2.32941    | 1E-16 * | 3.26757        | 1E-32 * | -0.635     | 0.28    |
| Indolic       | Core structure         | AT5G05260 | CYP79A2   | 0          | NA      | 0              | NA      | 0.5108     | NA      |
| Aliphatic     | Secondary modification | AT1G12140 | FMOGS-OX5 | -0.1466    | 0.369   | -0.0554        | 0.78    | -0.082     | 0.794   |
| Aliphatic     | Core structure         | AT1G16400 | CYP79F2   | 0.317      | 0.25    | 0.09901        | 0.776   | 0.1188     | 0.839   |
| Aliphatic     | Core structure         | AT1G16410 | CYP79F1   | -0.9739    | 2E-06   | -0.8671        | 3E-05   | 0.143      | 0.741   |
| Aliphatic     | Core structure         | AT1G18590 | SOT17     | -0.3329    | 0.124   | -0.2552        | 0.28    | 0.0627     | 0.896   |
| Aliphatic     | Side-chain elongation  | AT1G31180 | IMDH1     | -0.3635    | 0.006   | -0.2598        | 0.068   | 0.2077     | 0.326   |
| Aliphatic     | Secondary modification | AT1G62540 | FMOGS-OX2 | -0.2485    | 0.376   | -0.4027        | 0.164   | 0.9407     | 9E-04   |
| Aliphatic     | Secondary modification | AT1G62560 | FMOGS-OX3 | -1.2003    | 7E-11 * | -1.2947        | 5E-12 * | 0.4138     | 0.146   |
| Aliphatic     | Secondary modification | AT1G62570 | FMOGS-OX4 | -0.4049    | 0.208   | 0.19558        | 0.599   | 0.0302     | 0.971   |
| Aliphatic     | Secondary modification | AT1G65860 | FMOGS-OX1 | -0.8613    | 8E-05   | -0.9229        | 3E-05   | 0.3327     | 0.366   |
| Aliphatic     | Core structure         | AT1G74090 | SOT18     | -0.7812    | 5E-06   | -0.5582        | 0.002   | 0.0668     | 0.87    |
| Aliphatic     | Core structure         | AT1G78370 | GSTU20    | -0.9458    | 7E-06   | -1.108         | 1E-07 * | 0.6143     | 0.033   |
| Aliphatic     | Side-chain elongation  | AT1G80560 | IMDH2     | 0.0582     | 0.727   | 0.32618        | 0.018   | 0.2093     | 0.336   |
| Aliphatic     | Secondary modificatio  | AT2G25450 | GSL-OH    | 1.29853    | 9E-25 * | 1.7338         | 1E-43 * | 0.4221     | 0.017   |
| Aliphatic     | Core structure         | AT2G31790 | UGT74C1   | -0.8413    | 2E-05   | -0.5995        | 0.004   | 0.062      | 0.896   |
| Aliphatic     | Side-chain elongation  | AT2G43100 | IPMI2     | -0.768     | 1E-04   | -0.9607        | 1E-06   | 0.3889     | 0.208   |
| Aliphatic     | Core structure         | AT3G03190 | GSTF11    | -0.7026    | 0.003   | -0.4274        | 0.106   | 0.7727     | 0.007   |
| Aliphatic     | Side-chain elongation  | AT3G19710 | BCAT4     | -0.4958    | 0.005   | -0.4193        | 0.024   | 0.2858     | 0.314   |
| Aliphatic     | Side-chain elongation  | AT3G49680 | BCAT3     | -0.5933    | 5E-10   | -0.6429        | 3E-11   | 0.2755     | 0.041   |
| Aliphatic     | Side-chain elongation  | AT3G58990 | IPMI1     | -0.6562    | 0.004   | -0.9515        | 2E-05   | 0.2845     | 0.47    |

|                       |                        |           |           |         |       |           |       |          |         |
|-----------------------|------------------------|-----------|-----------|---------|-------|-----------|-------|----------|---------|
| Aliphatic             | Secondary modification | AT4G03060 | AOP2      | -0.8702 | 1E-05 | -0.9745   | 1E-06 | 0.4443   | 0.134   |
| Aliphatic             | Side-chain elongation  | AT4G12030 | BASS5     | -1.054  | 3E-06 | * -1.1129 | 8E-07 | * 0.2665 | 0.523   |
| Aliphatic             | Side-chain elongation  | AT4G13430 | IIL1      | -0.2764 | 0.063 | -0.2971   | 0.051 | -0.005   | 0.99    |
| Aliphatic             | Core structure         | AT4G13770 | CYP83A1   | -1.0524 | 1E-14 | * -1.1667 | 9E-18 | * 0.0811 | 0.794   |
| Aliphatic             | unknown                | AT4G03050 | AOP3      | 0       | NA    | 0.13791   | NA    | 0.1554   | NA      |
| Aliphatic             | Side-chain elongation  | AT5G14200 | IMDH3     | -0.9051 | 6E-10 | -0.9231   | 3E-10 | 0.5357   | 0.005   |
| Aliphatic             | Side-chain elongation  | AT5G23010 | MAM1      | -0.641  | 7E-05 | -0.7496   | 0.06  | 0.3623   | 0.135   |
| Aliphatic             | Core structure         | AT5G23020 | MAM3      | 0.65176 | 9E-04 | 0.26834   | 0.257 | -1.168   | 5E-06 * |
| Aliphatic and indolic | Core structure         | AT4G30530 | AT4G30530 | 0.61748 | 1E-04 | 0.78052   | 6E-07 | 0.3366   | 0.167   |
| Aliphatic and indolic | Core structure         | AT2G20610 | SUR1      | -0.221  | 0.157 | -0.1871   | 0.265 | -0.104   | 0.723   |
| Aliphatic and indolic | co-substrate           | AT4G23100 | GSH1      | -0.4229 | 0.004 | 0.10768   | 0.559 | -0.097   | 0.753   |
| Aliphatic and indolic | co-substrate           | AT5G65940 | CHY1      | 0.27467 | 0.08  | 0.21992   | 0.198 | 0.1716   | 0.531   |
| Aliphatic and indolic | co-substrate           | AT1G65880 | BZO1      | -0.8681 | 0.155 | -0.2651   | 0.725 | 0.1042   | NA      |
| Aliphatic and indolic | co-substrate           | AT2G14750 | APK1      | -0.1153 | 0.445 | -0.1953   | 0.187 | 0.2499   | 0.211   |
| Aliphatic and indolic | Transcription factor   | AT1G32640 | MYC2      | 0.70496 | 3E-04 | 1.45388   | 6E-15 | * 0.215  | 0.563   |
| Aliphatic and indolic | Transcription factor   | AT5G46760 | MYC3      | -0.158  | 0.409 | 0.24509   | 0.193 | -0.292   | 0.276   |
| Aliphatic and indolic | Transcription factor   | AT4G17880 | MYC4      | -1.4097 | 2E-15 | * -1.548  | 2E-17 | * -0.177 | 0.616   |
| Aliphatic             | Transcription factor   | AT5G61420 | MYB28     | -0.9735 | 3E-09 | -1.1561   | 2E-12 | * -0.028 | 0.952   |
| Aliphatic             | Transcription factor   | AT5G07690 | MYB29     | -1.6437 | 1E-17 | * -1.7609 | 2E-19 | * 0.2147 | 0.564   |
| Aliphatic             | Transcription factor   | AT5G07700 | MYB76     | -0.908  | 0.009 | -1.0325   | 7E-07 | * 0.3183 | 0.613   |
| Indolic               | Transcription factor   | AT5G60890 | MYB34     | -0.8344 | 8E-06 | -0.9473   | 0.07  | 0.1147   | 0.777   |
| Indolic               | Transcription factor   | AT1G18570 | MYB51     | 2.09471 | 1E-36 | * 2.83585 | 5E-67 | * -0.529 | 0.055   |
| Indolic               | Transcription factor   | AT1G74080 | MYB122    | 2.0296  | 5E-04 | * 2.54066 | 9E-06 | * -0.348 | NA      |
| Indolic               | Transcription factor   | AT4G17490 | ERF6      | 2.26971 | 4E-10 | * 3.6804  | 9E-26 | * 0.229  | 0.798   |
| Unknown               | Transcription factor   | AT5G46830 | MYC5      | -1.9652 | 5E-05 | * -2.1547 | 3E-05 | * 0.3971 | NA      |

Asterisk (\*) denote statistical significance.

**Supplemental table 4. List of primers used in this study.**

| Name      | Primer                         | Note       |
|-----------|--------------------------------|------------|
| NAI1-F    | ACCATTCTCACTAAGATGGACAACAAATT  | qRT Primer |
| NAI1-R    | ACGTTTAACCACTGCGAAATTCACA      | qRT Primer |
| NAI2-F    | AACTTGAGTTCGAAGCACATATCAATGA   | qRT Primer |
| NAI2-R    | TTCACGTTCAATGGCTTCCAACA        | qRT Primer |
| BGLU18-F  | CGAGGTTCGGACTTTACTACATCGAT     | qRT Primer |
| BGLU18-R  | TGTCCCGATAGGATTCTTGATCATCT     | qRT Primer |
| BGLU23-F  | ACGTTACGAGAAAGAATCCGGCA        | qRT Primer |
| BGLU23-R  | TCTTGGTCACTCACAAAGTAAAACATAGGA | qRT Primer |
| TSA1-F    | GGCTGACAAAGAAGAATCTGCAAAGA     | qRT Primer |
| TSA1-R    | GTTGGTATAACAATCGAGGAATCTTCGT   | qRT Primer |
| JAL34-F   | AAATCCAAGAGAGTTTGTGATTAACCATC  | qRT Primer |
| JAL34-R   | GCTGACCTCATAAGTGTTCAAGTTCGT    | qRT Primer |
| GLL23-F   | GAACGAATTGGCTAGAACAG           | qRT Primer |
| GLL23-R   | GCAACCATAAGCATCATGTG           | qRT Primer |
| MEB1-F    | AGGATGCCTTCTGCTTCTGT           | qRT Primer |
| MEB1-R    | GAGTGAAACGGGACCTCATT           | qRT Primer |
| ERF6-F    | ATTGTCTCCGTTGCCTACTA           | qRT Primer |
| ERF6-R    | GGTTTGGTTTCAAATTCAGA           | qRT Primer |
| MYB51-F   | AGCTCGTGGACTACCAGGAA           | qRT Primer |
| MYB51-R   | GGAGGTTATGCCCTTGTGTG           | qRT Primer |
| MYB122-F  | AACTTCATTGATCGGCGTCAC          | qRT Primer |
| MYB122-R  | ACCTCTTCGAATCTCCCCATC          | qRT Primer |
| CYP81F2-F | GTCACAGGGAGACGCTACTAC          | qRT Primer |
| CYP81F2-R | CACCACTGTTGTCATTGATGTC         | qRT Primer |
| CYP81F4-F | TTGTTGAACCACCCAAAAGTTT         | qRT Primer |
| CYP81F4-R | GGAGGTAAGGAAGGTTTGCT           | qRT Primer |
| NSP1-F    | ACTCCCTTGGGGCCTATGT            | qRT Primer |
| NSP1-R    | GCATCTTAGCCCTGGACCTT           | qRT Primer |
| ESM1-F    | AACGCCGTTCTTCGTAGGAT           | qRT Primer |
| ESM1-R    | TTCGAGTGCACGTTTCCCTT           | qRT Primer |

## References:

- Agee AE, Surpin M, Sohn EJ, Girke T, Rosado A, Kram BW, Carter C, Wentzell AM, Kliebenstein DJ, Jin HC, Park OK, Jin HL, Hicks GR, Raikhel NV (2010)** MODIFIED VACUOLE PHENOTYPE1 Is an Arabidopsis Myrosinase-Associated Protein Involved in Endomembrane Protein Trafficking. *Plant Physiology* **152**: 120-132
- Hakenjos JP, Bejai S, Ranftl Q, Behringer C, Vlot AC, Absmanner B, Hammes U, Heinzlmeir S, Kuster B, Schwechheimer C (2013)** ML3 Is a NEDD8-and Ubiquitin-Modified Protein. *Plant Physiology* **163**: 135-149
- Matsushima R, Fukao Y, Nishimura M, Hara-Nishimura I (2004)** NAI1 gene encodes a basic-helix-loop-helix-type putative transcription factor that regulates the formation of an endoplasmic reticulum-derived structure, the ER body. *Plant Cell* **16**: 1536-1549
- Nagano AJ, Fukao Y, Fujiwara M, Nishimura M, Hara-Nishimura I (2008)** Antagonistic jacalin-related lectins regulate the size of ER body-type beta-glucosidase complexes in *Arabidopsis thaliana*. *Plant Cell Physiol* **49**: 969-980
- Nakano RT, Matsushima R, Nagano AJ, Fukao Y, Fujiwara M, Kondo M, Nishimura M, Hara-Nishimura I (2012)** ERMO3/MVP1/GOLD36 Is Involved in a Cell Type-Specific Mechanism for Maintaining ER Morphology in *Arabidopsis thaliana*. *Plos One* **7**
- Nakano RT, Pislewska-Bednarek M, Yamada K, Edger PP, Miyahara M, Kondo M, Bottcher C, Mori M, Nishimura M, Schulze-Lefert P, Hara-Nishimura I, Bednarek P (2016)** PYK10 Myrosinase Reveals a Functional Coordination between ER Bodies and Glucosinolates in *Arabidopsis thaliana*. *Plant J*
- Nakano RT, Yamada K, Bednarek P, Nishimura M, Hara-Nishimura I (2014)** ER bodies in plants of the Brassicales order: biogenesis and association with innate immunity. *Front Plant Sci* **5**: 73
- Yamada K, Nagano AJ, Nishina M, Hara-Nishimura I, Nishimura M (2008)** NAI2 is an endoplasmic reticulum body component that enables ER body formation in *Arabidopsis thaliana*. *Plant Cell* **20**: 2529-2540
- Yamada K, Nagano AJ, Nishina M, Hara-Nishimura I, Nishimura M (2013)** Identification of two novel endoplasmic reticulum body-specific integral membrane proteins. *Plant Physiol* **161**: 108-120
